# Supplementary material for: Criegee + HONO reaction: the dominant sink of Criegee, and the missing non-photolytic source of OH•
Source: Copernicus journal article supplement (doi:10.5194/egusphere-2025-1364), 2025-04-24
Supplement: Supplementary file [file egusphere-2025-1364-AC1-supplement.pdf]

# Response to the Reviewer’s Comments

August 1, 2025

## 1 REFEREE REPORT

**Comment:** The atmospheric lifetimes of CH<sub>2</sub>OO with water dimer had been detailedly investigations from theoretical and experimental methods. Please read the reference (J. Am. Chem. Soc. 2021, 143, 8402-8413). The atmospheric lifetime is  $2.12 \times 10^{-4}$  sec at 0 km in Table 7 in J. Am. Chem. Soc. 2021, 143, 8402-8413. Although the atmospheric lifetime of CH<sub>2</sub>OO with water dimer is very long in the stratosphere, the concentrations of Criegee intermediates are very low at altitude above 15 km. Therefore, the importance of Criegee intermediates occurs in the troposphere. According to Table 1 in the present work, I assume that the concentration of HONO is about  $10^{10}$  molecules cm<sup>-3</sup> in the troposphere, which leads to the atmospheric lifetime of CH<sub>2</sub>OO with HONO is about 10<sup>2</sup> sec. This shows that HONO does not make any contribution to the sink of CH<sub>2</sub>OO. In addition, Criegee intermediates are mainly produced from the ozonolysis of BVOCs, while HONO is mainly produced at urban regions.

**Reply:** We agree with the reviewer that under high humid condition, HONO is not a major sink for simple CH<sub>2</sub>OO in the atmosphere; rather, it plays a dominant role in the removal of substituted Criegee intermediates, i.e., (CH<sub>3</sub>)<sub>2</sub>COO. This is clearly illustrated in Figure 3 and 4 of the main manuscript. It is evident from Figure 3 that at 100% relative humidity (RH), the reaction of CH<sub>2</sub>OO with (H<sub>2</sub>O)<sub>2</sub> is dominant across the entire temperature range studied (213–320 K). But it is important to mention that the concentration of (H<sub>2</sub>O)<sub>2</sub> as well as H<sub>2</sub>O greatly depends on the relative humidity (RH) and temperature. For example, at 20% RH, the effective rate constant ( $k_{eff}$ ) for CH<sub>2</sub>OO + HONO becomes comparable to the same for CH<sub>2</sub>OO + (H<sub>2</sub>O)<sub>2</sub> and CH<sub>2</sub>OO + H<sub>2</sub>O reactions in the lower temperature ranges of 213–235 K and 213–260 K, respectively. This suggests that although CH<sub>2</sub>OO + HONO is a minor sink under typical tropospheric conditions, it can become relevant under specific atmospheric conditions. We

have discussed it in the revised manuscript on page 7.

For the second concern of the referee regarding the sources of Criegee and HONO, it is worth mentioning that simpler Criegee intermediates (those Criegee which has less than four carbon atoms) are produced from the both sources, i.e. ozonolysis of biogenic volatile organic compounds (BVOCs) in forested environments and from anthropogenic sources in urban areas. For example,  $\text{CH}_2\text{OO}$  (formed from 23 VOCs) has 20% production from anthropogenic sources and 19% from biogenic sources. Similarly,  $(\text{CH}_3)_2\text{COO}$  (formed from 10 VOCs) has 28% anthropogenic production and 9% biogenic production. Thus, the two Criegee intermediates selected in the present work are representative of species emitted from both biogenic and anthropogenic sources. We have added a short discussion of it in the conclusion of the revised manuscript. As far as HONO is concerned, although HONO is primarily generated in urban regions, several field measurements have reported a reasonable HONO concentrations ( $\sim 10^8$  to  $10^{10}$  molecules  $\text{cm}^{-3}$ ) even in forested areas[6, 1, 10, 18, 5, 15, 11, 12, 19].

**Comment:** The second issue is computational methods. In fact, there are dozens of papers that have shown that post-CCSD(T) calculations are required to obtain quantitative barrier heights for the reactions including Criegee intermediates. Although I have to admit the introduction of the calculations will extremely increase the computational costs, it should be clearly explained and reviewed in the present progress. This is very helpful for potential readers to know the progress. Please read these articles (J. Am. Chem. Soc. 2025, 147 (14), 12263-12272.; Atmos. Environ. 2025, 341, 120928.; Research 2024, 7, 0525.; Fundam. Res. 2024, 4 (5), 1216-1224.; Proc. Natl. Acad. Sci. USA 2018, 115, 6135-6140. And so on).

**Reply:** As indicated by the reviewer, post-CCSD(T) calculations are indeed computationally very demanding. Still, to assess the uncertainty in the energetics due to the exclusion of post-CCSD(T) corrections, we have carried out CCSDT(Q)/CBS calculations for the smaller Criegee intermediate reaction ( $\text{CH}_2\text{OO} + \text{HONO}$ ). We have focused on key stationary points, i.e., the reactant complex (RC) and transition state (TS). The different components of post-CCSD(T) corrections ( $\delta_T$  and  $\delta_T(Q)$ ) are provided in Table S7 of the ESI. It is evident from Table S7 that post-CCSD(T) corrections have made only minor changes in the calculated energetics of the  $\text{CH}_2\text{OO} + \text{HONO}$  reaction. In fact, post-CCSD(T) corrections have reduced the stabilization energy of RC by only  $\sim 0.54$  kcal  $\text{mol}^{-1}$ ; on the other hand, they have raised the barrier height by a similar amount, i.e., 0.67 kcal  $\text{mol}^{-1}$ , which lies within the chemical accuracy. This suggests that our CCSD(T)/CBS//M06-2X/aug-cc-pVTZ level of theory is both reliable and

computationally efficient for studying the title reaction. To further confirm this, we have also computed the rate constants using the post-CCSD(T) level energetics and found negligible changes in the rate constant of  $\text{CH}_2\text{OO} + \text{HONO}$  reaction. For example, at 298 K, the rate constant decreased slightly from  $\sim 7.2 \times 10^{-12} \text{ cm}^3 \text{ molecule}^{-1} \text{ sec}^{-1}$  to  $\sim 5.5 \times 10^{-12} \text{ cm}^3 \text{ molecule}^{-1} \text{ sec}^{-1}$ . This further supports the reliability of our computational approach. We have discussed it in the revised manuscript on page 6 and line 180.

**Comment:** In kinetics calculations, there are still lots of factors that do not consider such as recrossing effects, torsional anharmonicity, and anharmonicity. In addition, the low energy barrier, what is the rate-determining step. I guess that the formed pre-reactive complex is the rate-determining step like Criegee reaction with  $\text{HCOOH}$ , Therefore, VRC-TST is necessary for the barrierless process.

**Reply:** The reviewer is right that in the title reaction, the formation of the pre-reactive complex is the rate-determining step. Since this step is barrierless, a variational treatment is essential for obtaining accurate rate coefficients. To account for this, we have employed KTOOLS code as implemented in MultiWell suite of programs, which uses variational transition state theory (VTST) for the barrierless association process. The inputs for the KTOOLS are potential energy surface scans along the coordinate describing the dissociation of RC to isolated reactants. Therefore, a variational approach is explicitly incorporated in our kinetic calculations for the initial step. We have now added few lines in the manuscript to make it more clearer. In fact, this methodology is consistent with previous studies on bimolecular reactions of Criegee intermediates, where similar kinetic treatments have been successfully applied [17, 8, 4, 3, 13, 7, 9, 14, 16, 2]. In addition, in the revised manuscript, we have also included a deterministic eigenvalue-eigenvector-based approach, specifically the Bartis-Widom method (implemented in MESMER program) to estimate rate constants. In addition, to account for torsional anharmonicity, we have also performed a relaxed potential energy scan of the torsional rotation along N–O bond of HONO moiety. The resulting torsional potential has been used to model hindered internal rotation (HIR). This correction led to negligible changes in the calculated rate constants. We have added the details of it on page 4.

**Comment:** Lines “Our study also suggests that HONO has the potential to become the most dominant sink of Criegee intermediate, surpassing  $\text{SO}_2$  and water dimer, even in high humid condition”, it is not validated.

**Reply:** We agree with the reviewer that this statement is not valid for

all types of CI + HONO reaction. In fact, we made this statement for our substituted  $(\text{CH}_3)_2\text{COO} + \text{HONO}$  reaction. In Figure 4 of the manuscript, it can be clearly seen that the  $k_{\text{eff}}$  of  $(\text{CH}_3)_2\text{COO} + \text{HONO}$  reaction is dominant over almost the entire temperature range, even in the presence of  $(\text{H}_2\text{O})_2$  at RH 100% and  $\text{SO}_2$ . Therefore, this statement is quite valid for the dimethyl-substituted Criegee intermediate but not for all the Criegee intermediate. Now in the revised manuscript, we have corrected that statement in the abstract.

**Comment:** Lines “the bimolecular reaction paths can be the main sink of sCI (Osborn and Taatjes, 2015; Lin et al., 2015; Sheps et al., 2014; Vereecken and Francisco, 2012).” Some important key references have been missed such as . J. Am. Chem. Soc. 2016, 138, 14409-14422. and J. Am. Chem. Soc. 2021, 143, 8402-8413.

**Reply:** Thanks for the references. These references was indeed helpful. As per the reviewer’s advice, we have duly cited these references in the revised manuscript.

**Comment:** Kinetics methods should be moved into computational section.

**Reply:** As per the reviewer’s advice, we have now moved the kinetics methods to the methodology section of the revised manuscript.

**Comment:** It needs to add some tables for showing the atmospheric lifetimes of Criegee intermediates with  $\text{H}_2\text{O}$ ,  $(\text{H}_2\text{O})_2$ ,  $\text{SO}_2$ ,  $\text{HCOOH}$ , and  $\text{HONO}$  as the function of altitude.

**Reply:** Unfortunately, we could not find any literature containing relevant data on HONO concentrations as a function of altitude (perhaps due to difficulty in the field measurements). Therefore, we have avoided estimating altitude-dependent lifetimes of Criegee intermediates with HONO.

## References

- [1] Karin Acker, Detlev Möller, Wolfgang Wieprecht, Franz X Meixner, Birger Bohn, Stefan Gilge, Christian Plass-Dülmer, and Harald Berresheim. Strong daytime production of oh from hno<sub>2</sub> at a rural mountain site. *Geophys. Res. Lett.*, 33(2), 2006.

- [2] Vishva Jeet Anand and Pradeep Kumar. Mechanistic insight into the  $\text{n}_2\text{o} + \text{o}(^1\text{d}, ^3\text{p})$  reaction: role of post-ccsd(t) corrections and non-adiabatic effects. *Phys. Chem. Chem. Phys.*, 25(48):33119–33129, 2023.
- [3] Rabi Chhantyal-Pun, Robin J Shannon, David P Tew, Rebecca L Caravan, Marta Duchi, Callum Wong, Aidan Ingham, Charlotte Feldman, Max R McGillen, M Anwar H Khan, et al. Experimental and computational studies of criegee intermediate reactions with  $\text{nh}_3$  and  $\text{ch}_3\text{nh}_2$ . *Phys. Chem. Chem. Phys.*, 21(26):14042–14052, 2019.
- [4] Amit Debnath and Balla Rajakumar. Bimolecular kinetics of criegee intermediate ( $\text{ch}_2\text{oo}$ ) with 2-pentanone: experimental and theoretical analysis in atmospheric conditions. *Environmental Science and Pollution Research*, pages 1–10, 2024.
- [5] Yi He, Xianliang Zhou, Jian Hou, Honglian Gao, and Steven B Bertman. Importance of dew in controlling the air-surface exchange of hono in rural forested environments. *Geophys. Res. Lett.*, 33(2), 2006.
- [6] Saewung Kim, S-Y Kim, Meehye Lee, Heeyoun Shim, GM Wolfe, Alex B Guenther, Amy He, Youdeog Hong, and Jinseok Han. Impact of isoprene and hono chemistry on ozone and ovoc formation in a semirural south korean forest. *Atmos. Chem. Phys.*, 15(8):4357–4371, 2015.
- [7] Stephen J Klippenstein and James A Miller. From the time-dependent, multiple-well master equation to phenomenological rate coefficients. *J. Phys. Chem. A.*, 106(40):9267–9277, 2002.
- [8] Keith T Kuwata, Emily J Guinn, Matthew R Hermes, Jenna A Fernandez, Jon M Mathison, and Ke Huang. A computational re-examination of the criegee intermediate–sulfur dioxide reaction. *J. Phys. Chem. A.*, 119(41):10316–10335, 2015.
- [9] Jari Peltola, Prasenjit Seal, Anni Inkilä, and Arkke Eskola. Time-resolved, broadband uv-absorption spectrometry measurements of criegee intermediate kinetics using a new photolytic precursor: unimolecular decomposition of  $\text{ch}_2\text{oo}$  and its reaction with formic acid. *Phys. Chem. Chem. Phys.*, 22(21):11797–11808, 2020.
- [10] X Ren, H Gao, X Zhou, JD Crounse, PO Wennberg, EC Browne, BW LaFranchi, RC Cohen, M McKay, AH Goldstein, et al. Measurement of atmospheric nitrous acid at bodgett forest during bearpex2007. *Atmos. Chem. Phys.*, 10(13):6283–6294, 2010.
- [11] Xinrong Ren, William H Brune, Angelique Oliger, Andrew R Metcalf, James B Simpas, Terry Shirley, James J Schwab, Chunhong Bai, Utpal

- Roychowdhury, Yongquan Li, et al. Oh, ho<sub>2</sub>, and oh reactivity during the pmtacs–ny whiteface mountain 2002 campaign: Observations and model comparison. *J. Geophys. Res. Atmos.*, 111(D10), 2006.
- [12] Alberto Rondon and Eugenio Sanhueza. High hono atmospheric concentrations during vegetation burning in the tropical savannah. *Tellus B*, 41(4):474–477, 1989.
- [13] Saptarshi Sarkar and Biman Bandyopadhyay. Singlet (<sup>1</sup>δ<sub>g</sub>) o<sub>2</sub> as an efficient tropospheric oxidizing agent: the gas phase reaction with the simplest criegee intermediate. *Phys. Chem. Chem. Phys.*, 22(35):19870–19876, 2020.
- [14] Daniel Stone, Kendrew Au, Samantha Sime, Diogo J Medeiros, Mark Blitz, Paul W Seakins, Zachary Decker, and Leonid Sheps. Unimolecular decomposition kinetics of the stabilised criegee intermediates ch<sub>2</sub>oo and cd<sub>2</sub>oo. *Phys. Chem. Chem. Phys.*, 20(38):24940–24954, 2018.
- [15] Hang Su, Ya Fang Cheng, Min Shao, Dong Feng Gao, Zhong Ying Yu, Li Min Zeng, Jacob Slanina, Yuan Hang Zhang, and Alfred Wiedensohler. Nitrous acid (hono) and its daytime sources at a rural site during the 2004 pride-prd experiment in china. *J. Geophys. Res. Atmos.*, 113(D14), 2008.
- [16] Michael F Vansco, Rebecca L Caravan, Kristen Zuraski, Frank AF Winiberg, Kendrew Au, Nisalak Trongsiwat, Patrick J Walsh, David L Osborn, Carl J Percival, M Anwar H Khan, et al. Experimental evidence of dioxole unimolecular decay pathway for isoprene-derived criegee intermediates. *J. Phys. Chem. A.*, 124(18):3542–3554, 2020.
- [17] Nathan AI Watson and Joseph M Beames. Bimolecular sinks of criegee intermediates derived from hydrofluoroolefins—a computational analysis. *Environ. Sci. Atmos*, 3(10):1460–1484, 2023.
- [18] N Zhang, X Zhou, S Bertman, D Tang, M Alaghmand, PB Shepson, and MA Carroll. Measurements of ambient hono concentrations and vertical hono flux above a northern michigan forest canopy. *Atmos. Chem. Phys.*, 12(17):8285–8296, 2012.
- [19] Xianliang Zhou, Ning Zhang, Michaela TerAvest, David Tang, Jian Hou, Steve Bertman, Marjan Alaghmand, Paul B Shepson, Mary Anne Carroll, Stephen Griffith, et al. Nitric acid photolysis on forest canopy surface as a source for tropospheric nitrous acid. *Nat. Geosci.*, 4(7):440–443, 2011.
